# Supplementary material for: The NUCKS1-SKP2-p21/p27 axis controls S phase entry
Source: PubMed Central journal article supplement (PMC8630071; doi:10.1038/s41467-021-27124-8), 2021-11-29
Supplement: 41467_2021_27124_MOESM2_ESM.pdf [file 41467_2021_27124_MOESM2_ESM.pdf]

## Reporting Summary

Nature Portfolio wishes to improve the reproducibility of the work that we publish. This form provides structure for consistency and transparency in reporting. For further information on Nature Portfolio policies, see our [Editorial Policies](#) and the [Editorial Policy Checklist](#).

### Statistics

For all statistical analyses, confirm that the following items are present in the figure legend, table legend, main text, or Methods section.

n/a Confirmed

- The exact sample size ( $n$ ) for each experimental group/condition, given as a discrete number and unit of measurement
- A statement on whether measurements were taken from distinct samples or whether the same sample was measured repeatedly
- The statistical test(s) used AND whether they are one- or two-sided  
*Only common tests should be described solely by name; describe more complex techniques in the Methods section.*
- A description of all covariates tested
- A description of any assumptions or corrections, such as tests of normality and adjustment for multiple comparisons
- A full description of the statistical parameters including central tendency (e.g. means) or other basic estimates (e.g. regression coefficient) AND variation (e.g. standard deviation) or associated estimates of uncertainty (e.g. confidence intervals)
- For null hypothesis testing, the test statistic (e.g.  $F$ ,  $t$ ,  $r$ ) with confidence intervals, effect sizes, degrees of freedom and  $P$  value noted  
*Give  $P$  values as exact values whenever suitable.*
- For Bayesian analysis, information on the choice of priors and Markov chain Monte Carlo settings
- For hierarchical and complex designs, identification of the appropriate level for tests and full reporting of outcomes
- Estimates of effect sizes (e.g. Cohen's  $d$ , Pearson's  $r$ ), indicating how they were calculated

*Our web collection on [statistics for biologists](#) contains articles on many of the points above.*

### Software and code

Policy information about [availability of computer code](#)

Data collection

Data analysis

For manuscripts utilizing custom algorithms or software that are central to the research but not yet described in published literature, software must be made available to editors and reviewers. We strongly encourage code deposition in a community repository (e.g. GitHub). See the Nature Portfolio [guidelines for submitting code & software](#) for further information.

### Data

Policy information about [availability of data](#)

All manuscripts must include a [data availability statement](#). This statement should provide the following information, where applicable:

- Accession codes, unique identifiers, or web links for publicly available datasets
- A description of any restrictions on data availability
- For clinical datasets or third party data, please ensure that the statement adheres to our [policy](#)

All source data are provided in the Source Data file.

Publicly-available datasets used:

SEEK (Zhu et al., Nature Methods 2015) <http://seek.princeton.edu/>  
Genecodis3 (Tabas-Madrid et al., Nucleic Acids Research 2012) <http://genecodis.cnb.csic.es>  
GEPIA2 (Tang et al., Nucleic Acids Research 2019) <http://gepia2.cancer-pku.cn/#index>

## Field-specific reporting

Please select the one below that is the best fit for your research. If you are not sure, read the appropriate sections before making your selection.

Life sciences  Behavioural & social sciences  Ecological, evolutionary & environmental sciences

For a reference copy of the document with all sections, see [nature.com/documents/nr-reporting-summary-flat.pdf](https://www.nature.com/documents/nr-reporting-summary-flat.pdf)

## Life sciences study design

All studies must disclose on these points even when the disclosure is negative.

Sample size

For flow cytometry, at least 10,000 cells were measured per condition.  
For immunofluorescence, over 100 cells were quantified per condition.  
For comet assays, over 50 cells were quantified per test condition.  
Most experiments were repeated two or three times, and most phenotypes were interrogated from multiple angles. For example, we measured SKP2 mRNA levels following loss of NUCKS1 in multiple cell lines, using different siRNAs as well as NUCKS1-knockout cells. This was further confirmed at the protein level, using multiple cell lines.  
Most of our bioinformatics analyses include the results of hundreds of patients.  
  
These sample sizes were chosen based on the current standards in the literature.

Data exclusions

No relevant data were excluded from the study.

Replication

Most experiments were repeated 2-3 times, and all replication attempts were successful. Most phenotypes were further investigated using orthogonal approaches to increase reliability.

Randomization

Different cell samples started from similar conditions and treatments were then randomly allocated.

Blinding

Blinding was not performed. Many experiments (for example Western blots) rely on knowledge of sample identity to load in a logical order.

## Reporting for specific materials, systems and methods

We require information from authors about some types of materials, experimental systems and methods used in many studies. Here, indicate whether each material, system or method listed is relevant to your study. If you are not sure if a list item applies to your research, read the appropriate section before selecting a response.

### Materials & experimental systems

### Methods

| n/a                                 | Involved in the study                                     |
|-------------------------------------|-----------------------------------------------------------|
| <input type="checkbox"/>            | <input checked="" type="checkbox"/> Antibodies            |
| <input type="checkbox"/>            | <input checked="" type="checkbox"/> Eukaryotic cell lines |
| <input checked="" type="checkbox"/> | <input type="checkbox"/> Palaeontology and archaeology    |
| <input checked="" type="checkbox"/> | <input type="checkbox"/> Animals and other organisms      |
| <input checked="" type="checkbox"/> | <input type="checkbox"/> Human research participants      |
| <input checked="" type="checkbox"/> | <input type="checkbox"/> Clinical data                    |
| <input checked="" type="checkbox"/> | <input type="checkbox"/> Dual use research of concern     |

| n/a                                 | Involved in the study                              |
|-------------------------------------|----------------------------------------------------|
| <input checked="" type="checkbox"/> | <input type="checkbox"/> ChIP-seq                  |
| <input type="checkbox"/>            | <input checked="" type="checkbox"/> Flow cytometry |
| <input checked="" type="checkbox"/> | <input type="checkbox"/> MRI-based neuroimaging    |

## Antibodies

Antibodies used

NUCKS1 (kind gift from Anne Østvoid), NUCKS1 (ProteinTech 12023-2-AP), SKP2 (Thermofisher 32-3300), p21 (Cell signaling #2947), p27 (Cell signaling #2552), p53 (Santa Cruz sc-126), PCNA (Santa Cruz sc-56), MLH1 (Abcam ab92312), Beta-Actin (Abcam ab6276), Alpha-Tubulin (Sigma T6199), Alpha-Tubulin (Abcam ab4074), Vinculin (Santa Cruz sc-73614), Histone H3 (Abcam ab201456), Cyclin A2 (Abcam ab181591), IRDye® 800CW Goat anti-Rabbit IgG (H + L) (Li-Cor 925-32211), IRDye® 680RD Goat anti-Mouse IgG (H + L) (Li-Cor 925-68070), IRDye® 680RD Goat anti-Rabbit IgG Secondary Antibody (Li-Cor 925-68071), IRDye® 800CW Goat anti-Mouse IgG Secondary Antibody (Li-Cor 926-32210), Normal rabbit IgG (Santa Cruz sc-2027), Normal mouse IgG (Santa Cruz sc-2025), γH2AX (Millipore 05-636), 53BP1 (Santa Cruz sc-22760), Alexa Fluor 488, Goat Anti-Rabbit IgG (H + L) (Thermofisher A-11034), Alexa Fluor 555, Goat Anti-Mouse IgG (H + L) (Thermofisher A-32727).

Validation

Antibodies were validated by siRNA-mediated depletion, because they react as expected in response to treatment (for example the cyclin A2 antibody detects a protein only expressed in S/G2 phase, the 53BP1 antibody forms foci in response to DNA damage, the

p53 antibody is upregulated in response to DNA damage), by molecular weight using Western blot, and/or by the manufacturers:

NUCKS1 12023-2-AP: validated by manufacturer for Western blot and IP  
 SKP2 32-3300: validated by manufacturer for Western blot  
 p21 2947: validated by manufacturer for Western blot  
 p27 2552: validated by manufacturer for Western blot  
 p53 sc-126: validated by manufacturer for Western blot  
 PCNA sc-56: validated by manufacturer for Western blot  
 MLH1 ab92312: validated by manufacturer for Western blot  
 Actin ab6276: validated by manufacturer for Western blot  
 Tubulin T6199: validated by manufacturer for Western blot  
 Tubulin ab4074: validated by manufacturer for Western blot  
 Vinculin sc-73614: validated by manufacturer for Western blot  
 Histone H3 ab201456: validated by manufacturer for Western blot  
 Cyclin A2 ab181591: validated by manufacturer for Western blot  
 γH2AX 05-636: validated by manufacturer for immunofluorescence  
 53BP1 sc-22760: validated by manufacturer for immunofluorescence

## Eukaryotic cell lines

Policy information about [cell lines](#)

|                                                                   |                                                                                                                                                                                                                                                                                                                                                                                                                                                                               |
|-------------------------------------------------------------------|-------------------------------------------------------------------------------------------------------------------------------------------------------------------------------------------------------------------------------------------------------------------------------------------------------------------------------------------------------------------------------------------------------------------------------------------------------------------------------|
| Cell line source(s)                                               | TIG-1 (Coriell Institute Cell Repository AG06173), NBE1-hTERT (Prof. Anderson Ryan), U2OS (ATCC® HTB-96™), U2OS NUCKS1-KO (this study), RPE1-hTERT (ATCC® CRL-4000™), RPE1-hTERT TP53-KO (Dr. Ross Chapman), RPE1-hTERT CDKN1A-KO (Prof. Iain Cheeseman), RKO (ATCC® CRL-2577™), HCT116 (ATCC® CCL-247™), HCT116 TP53-KO (Prof. Vogelstein), CACO2 (ATCC® HTB-37™), HT29 (ATCC® HTB-38™), Doxycycline-inducible SKP2 A549 (Prof. Shyamala Maheswaran), DLD1 (ATCC® CCL-221™). |
| Authentication                                                    | Cell lines were not authenticated by us.                                                                                                                                                                                                                                                                                                                                                                                                                                      |
| Mycoplasma contamination                                          | All cell lines tested negative for mycoplasma, using the MycoAlert™ Mycoplasma Detection Kit (Lonza LR07-218).                                                                                                                                                                                                                                                                                                                                                                |
| Commonly misidentified lines (See <a href="#">ICLAC</a> register) | No commonly misidentified cell lines were used in the study.                                                                                                                                                                                                                                                                                                                                                                                                                  |

## Flow Cytometry

### Plots

Confirm that:

- The axis labels state the marker and fluorochrome used (e.g. CD4-FITC).
- The axis scales are clearly visible. Include numbers along axes only for bottom left plot of group (a 'group' is an analysis of identical markers).
- All plots are contour plots with outliers or pseudocolor plots.
- A numerical value for number of cells or percentage (with statistics) is provided.

### Methodology

|                           |                                                                                                                                                                                                                                                                                                                                                                                                                      |
|---------------------------|----------------------------------------------------------------------------------------------------------------------------------------------------------------------------------------------------------------------------------------------------------------------------------------------------------------------------------------------------------------------------------------------------------------------|
| Sample preparation        | For propidium iodide staining, trypsinised cells were fixed in cold 70% ethanol for 30 min on ice. Cells were then centrifuged at 250g for 5 min and resuspended in PBS with 0.5 µg/ml RNaseA and 10 µg/ml propidium iodide, before incubation for 15 min at 37 °C.<br>For EdU/PI staining, the Click-iT™ Plus EdU Alexa Fluor™ 488 Flow Cytometry Assay Kit was used, according to the manufacturer's instructions. |
| Instrument                | The FACSCalibur and CytoFLEX machines were used.                                                                                                                                                                                                                                                                                                                                                                     |
| Software                  | FlowJo v10.6.1, ModFit LT 4.1.7                                                                                                                                                                                                                                                                                                                                                                                      |
| Cell population abundance | The percentage of cells in G0/G1, S and G2/M phases was assessed.                                                                                                                                                                                                                                                                                                                                                    |
| Gating strategy           | Single, live cells were isolated using a plot of propidium iodide vs. width (Supplementary Figure 5).                                                                                                                                                                                                                                                                                                                |
|                           | <input checked="" type="checkbox"/> Tick this box to confirm that a figure exemplifying the gating strategy is provided in the Supplementary Information.                                                                                                                                                                                                                                                            |
